# Supplementary material for: Modelling and in vivo evaluation of tendon forces and strain in dynamic rehabilitation exercises: a scoping review
Source: HighWire-hosted journal article supplement (doi:10.1136/bmjopen-2021-057605), 2022-07-01
Supplement: bmjopen-2021-057605supp001_data_supplement.pdf [file bmjopen-2021-057605supp001_data_supplement.pdf]

## **SUPPLEMENTARY FILE**

BMJ OPEN

Supplement to: *Modelling and in vivo evaluation of tendon forces and loads in dynamic rehabilitation exercises: a scoping review*

Adrian Escriche-Escuder, Antonio I. Cuesta-Vargas, José Casaña

## **TABLE OF CONTENTS**

### **Supplementary Appendices**

**Appendix S1.** Detailed information sources and search strategy..... 3

**Appendix S2.** Articles excluded with full-text with reasons..... 4

**Appendix S1.** Detailed information sources and search strategy

|                                         | Pubmed       | EMBASE      | WOS         | Google Scholar<br>(200 primeras) |
|-----------------------------------------|--------------|-------------|-------------|----------------------------------|
| Tendon AND Load                         | 3837         | 4311        |             | 200                              |
| Tendon [Title] AND Load [Title]         | 100          | 183         | 536         |                                  |
| Tendon [Title] AND Force [Title]        | 185          | 202         | 297         |                                  |
| Tendon [Title] AND Biomechanics [Title] | 90           | 111         | 83          |                                  |
| Tendon AND wave                         | 893          | 1220        | 1282        | 200                              |
| Tendon [Title] AND Properties [Title]   | 685          | 755         | 801         |                                  |
| Tendon AND Force                        |              |             |             | 200                              |
| Tendon AND Biomechanics                 |              |             |             | 200                              |
| Tendon AND Properties                   |              |             |             | 200                              |
|                                         | <b>5790</b>  | <b>6782</b> | <b>2999</b> | <b>1000</b>                      |
| <b>Total</b>                            | <b>16571</b> |             |             |                                  |

**Appendix S2.** Articles excluded with full-text with reasons

| <b>Autor and year</b>      | <b>Title</b>                                                                                                                           | <b>Reasons for exclusion</b>          |
|----------------------------|----------------------------------------------------------------------------------------------------------------------------------------|---------------------------------------|
| Acuna et al. 2019          | Achilles tendon shear wave speed tracks the dynamic modulation of standing balance                                                     | No tendon forces/load evaluation      |
| Aita et al. 1998           | The load applied to the foot in a patellar ligament-bearing cast                                                                       | No tendon forces/load evaluation      |
| Andarawis-Puri et al. 2010 | Infraspinatus and supraspinatus tendon strain explained using multiple regression models.                                              | No tendon forces/load evaluation      |
| Ando et al. 2019           | Positive relationship between passive muscle stiffness and rapid force production                                                      | No tendon forces/load evaluation      |
| Ateş et al. 2015           | Muscle shear elastic modulus is linearly related to muscle torque over the entire range of isometric contraction intensity             | No tendon forces/load evaluation      |
| Beck et al. 2020           | Cyclically producing the same average muscle-tendon force with a smaller duty increases metabolic rate                                 | No tendon forces/load evaluation      |
| Bobbert et al. 1986        | An estimation of power output and work done by the human triceps surae muscle-tendon complex in jumping                                | No tendon forces/load evaluation      |
| Bojsen-Møller et al. 2003  | Measuring mechanical properties of the vastus lateralis tendon-aponeurosis complex in vivo by ultrasound imaging                       | No tendon forces/load evaluation      |
| Bojsen-Møller et al. 2005  | Muscle performance during maximal isometric and dynamic contractions is influenced by the stiffness of the tendinous structures        | No tendon forces/load evaluation      |
| Bolus et al. 2021          | Fit to Burst: Toward Noninvasive Estimation of Achilles Tendon Load Using Burst Vibrations                                             | Proof-of-concept study                |
| Breda et al. 2020          | The association between patellar tendon stiffness measured with shear-wave elastography and patellar tendinopathy—a case-control study | No tendon forces/load evaluation      |
| Bruggemann 1985            | Mechanical load on the Achilles-tendon during rapid dynamic sport movements                                                            | Wrong publication type (Book chapter) |
| Brum et al. 2013           | In Vivo Achilles Tendon Elasticity Assessment using                                                                                    | No tendon forces/load evaluation      |

|                             |                                                                                                                                                               |                                                                                                              |
|-----------------------------|---------------------------------------------------------------------------------------------------------------------------------------------------------------|--------------------------------------------------------------------------------------------------------------|
|                             | Supersonic Shear Imaging: a feasibility study                                                                                                                 |                                                                                                              |
| Bujalski et al. 2018        | A Monte Carlo analysis of muscle force estimation sensitivity to muscle-tendon properties using a Hill-based muscle model                                     | No tendon forces/load evaluation                                                                             |
| Burgess et al. 2007         | Plyometric vs. Isometric training influences on tendon properties and muscle output                                                                           | Tendon forces are used as part of the calculation of other parameters and not reported as evaluation results |
| Cao et al. 2019             | A multicenter large-sample shear wave ultrasound elastographic study of the achilles tendon in chinese adults                                                 | No tendon forces/load evaluation                                                                             |
| Cattagni et al. 2017        | No Alteration of the Neuromuscular Performance of Plantar-Flexor Muscles After Achilles Tendon Vibration                                                      | No tendon forces/load evaluation                                                                             |
| Centner et al. 2019         | Low-load blood flow restriction training induces similar morphological and mechanical Achilles tendon adaptations compared with high-load resistance training | Tendon forces are used as part of the calculation of other parameters and not reported as evaluation results |
| Chang et al. 2020           | Strain ratio of ultrasound elastography for the evaluation of tendon elasticity                                                                               | No tendon forces/load evaluation                                                                             |
| Cheung et al. 2006          | Effect of Achilles tendon loading on plantar fascia tension in the standing foot.                                                                             | No dynamic exercises (No exercises evaluated)                                                                |
| Cordo et al. 1993           | Force and displacement-controlled tendon vibration in humans                                                                                                  | No dynamic exercises (No exercises are used)                                                                 |
| Cordo et al. 1993           | Force and displacement-controlled tendon vibration in humans                                                                                                  | No dynamic exercises (No exercises are used)                                                                 |
| Cruz-Montecinos et al. 2015 | Estimation of tensile properties of the Achilles tendon in haemophilic arthropathy of the ankle: case study                                                   | Tendon forces are used as part of the calculation of other parameters and not reported as evaluation results |
| Cruz-Montecinos et al. 2019 | Assessment of tensile mechanical properties of the Achilles tendon in adult patients with haemophilic arthropathy. Reproducibility study                      | Tendon forces are used as part of the calculation of other parameters and not reported as evaluation results |
| Deforth et al. 2019         | The effect of foot type on the Achilles tendon moment arm and biomechanics                                                                                    | No tendon forces/load evaluation                                                                             |

|                            |                                                                                                                                                                                            |                                                                                                              |
|----------------------------|--------------------------------------------------------------------------------------------------------------------------------------------------------------------------------------------|--------------------------------------------------------------------------------------------------------------|
| Delp et al. 2007           | OpenSim: open-source software to create and analyze dynamic simulations of movement.                                                                                                       | Wrong publication type                                                                                       |
| Dennerlein et al. 1999     | In vivo finger flexor tendon force while tapping on a keyswitch                                                                                                                            | No dynamic exercises (everyday tasks)                                                                        |
| Ebrahimi et al. 2020       | Shear Wave Tensiometry Reveals an Age-Related Deficit in Triceps Surae Work at Slow and Fast Walking Speeds                                                                                | Tendon forces are used as part of the calculation of other parameters and not reported as evaluation results |
| Ejeskar et al. 1982        | Finger flexion force and hand grip strength after tendon repair                                                                                                                            | No tendon forces/load evaluation                                                                             |
| Farris et al. 2013         | Differential strain patterns of the human Achilles tendon determined in vivo with freehand three-dimensional ultrasound imaging                                                            | No dynamic exercises (isometric)                                                                             |
| Finni et al. 2008          | Mechanical behavior of the quadriceps femoris muscle tendon unit during low-load contractions                                                                                              | No dynamic exercises (laboratory setting)                                                                    |
| Firminger et al. 2019      | Effect of Shoe and Surface Stiffness on Lower Limb Tendon Strain in Jumping                                                                                                                | Tendon forces are used as part of the calculation of other parameters and not reported as evaluation results |
| Fowler and Nicol 2000      | Interphalangeal joint and tendon forces: normal model and biomechanical consequences of surgical reconstruction                                                                            | No dynamic exercises (everyday tasks)                                                                        |
| Fowler et al. 1999         | Measurement of external three-dimensional interphalangeal loads applied during activities of daily living                                                                                  | No tendon forces/load evaluation                                                                             |
| Friesenbichler et al. 2019 | Gait and strength asymmetries in patients with insertional achilles tendinopathy                                                                                                           | No tendon forces/load evaluation                                                                             |
| Fröberg et al. 2020        | The Effect of Ankle Foot Orthosis' Design and Degree of Dorsiflexion on Achilles Tendon Biomechanics-Tendon Displacement, Lower Leg Muscle Activation, and Plantar Pressure During Walking | No tendon forces/load evaluation                                                                             |
| Gerus et al. 2011          | A method to characterize in vivo tendon force-strain relationship by combining ultrasonography,                                                                                            | Tendon forces are used as part of the calculation of other parameters and not                                |

|                             |                                                                                                                                     |                                                                                                              |
|-----------------------------|-------------------------------------------------------------------------------------------------------------------------------------|--------------------------------------------------------------------------------------------------------------|
|                             | motion capture and loading rates                                                                                                    | reported as evaluation results                                                                               |
| Gerus et al. 2012           | Subject-Specific Tendon-Aponeurosis Definition in Hill-Type Model Predicts Higher Muscle Forces in Dynamic Tasks                    | Tendon forces are used as part of the calculation of other parameters and not reported as evaluation results |
| Giacomozzi et al. 2015      | Does the thickening of Achilles tendon and plantar fascia contribute to the alteration of diabetic foot loading?                    | No tendon forces/load evaluation                                                                             |
| Gomes et al. 2020           | Is there a relationship between back squat depth, ankle flexibility, and Achilles tendon stiffness?                                 | Tendon forces are used as part of the calculation of other parameters and not reported as evaluation results |
| Hager et al. 2020           | Influence of joint angle on muscle fascicle dynamics and rate of torque development during isometric explosive contractions.        | No tendon forces/load evaluation                                                                             |
| Hansen et al. 2006          | Mechanical properties of the human patellar tendon, in vivo                                                                         | Tendon forces are used as part of the calculation of other parameters and not reported as evaluation results |
| Harding et al. 1993         | Finger joint force minimization in pianists using optimization techniques                                                           | No dynamic exercises (everyday tasks)                                                                        |
| Harlaar et al. 2020         | Patellofemoral joint contact forces at different activities - effects of modeling assumptions                                       | No tendon forces/load evaluation                                                                             |
| Harnie et al. 2020          | Acute effect of tendon vibration applied during isometric contraction at two knee angles on maximal knee extension force production | No tendon forces/load evaluation                                                                             |
| Hashizume and Yanagiya 2016 | Influences of the foot strike pattern and the running speed on the forces applied to foot                                           | Wrong publication type (Conference proceeding)                                                               |
| Haufe et al. 2020           | Biomechanical effects of passive hip springs during walking                                                                         | No tendon forces/load evaluation                                                                             |
| Hauraix et al. 2015         | In vivo maximal fascicle-shortening velocity during plantar flexion in humans.                                                      | No tendon forces/load evaluation                                                                             |
| Heinemeier et al. 2016      | Methods of Assessing Human Tendon Metabolism and Tissue Properties in Response to Changes in Mechanical Loading                     | Wrong publication type (Book chapter)                                                                        |

|                         |                                                                                                                                    |                                                                                                              |
|-------------------------|------------------------------------------------------------------------------------------------------------------------------------|--------------------------------------------------------------------------------------------------------------|
| Helland et al. 2013     | Mechanical properties of the patellar tendon in elite volleyball players with and without patellar tendinopathy.                   | No tendon forces/load evaluation                                                                             |
| Histen et al. 2017      | Achilles Tendon Properties of Minimalist and Traditionally Shod Runners                                                            | Tendon forces are used as part of the calculation of other parameters and not reported as evaluation results |
| Hoang et al. 2007       | Passive mechanical properties of human gastrocnemius muscle-tendon units, muscle fascicles and tendons in vivo                     | No dynamic exercises                                                                                         |
| Hof et al. 2002         | Mechanics of human triceps surae muscle in walking, running and jumping                                                            | No tendon forces/load evaluation                                                                             |
| Holzer et al. 2020      | Considerations on the human Achilles tendon moment arm for in vivo triceps surae muscle-tendon unit force estimates                | Wrong study design (calculations using results from other studies)                                           |
| Homayuouni et al. 2015  | Modeling Implantable Passive Mechanisms for Modifying the Transmission of Forces and Movements Between Muscle and Tendons          | No tendon forces/load evaluation                                                                             |
| Hopper et al. 2015      | Dance floor force reduction influences ankle loads in dancers during drop landings.                                                | No tendon forces/load evaluation                                                                             |
| Hu et al. 2014          | Biomechanical Analysis of Force Distribution in Human Finger Extensor Mechanisms                                                   | Tendon forces are used as part of the calculation of other parameters and not reported as evaluation results |
| Hullfish et al. 2020    | A simple instrumented insole algorithm to estimate plantar flexion moments                                                         | No tendon forces/load evaluation                                                                             |
| Jones et al. 1985       | Effect of muscle tendon vibration on the perception of force                                                                       | No tendon forces/load evaluation                                                                             |
| Joseph et al. 2014      | Achilles tendon biomechanics in response to acute intense exercise.                                                                | No dynamic exercises                                                                                         |
| Kathy Cheng et al. 2008 | Finite element analysis of plantar fascia under stretch— The relative contribution of windlass mechanism and Achilles tendon force | Wrong study design (Finite element analysis)/ No tendon forces/load evaluation                               |
| Kawakami et al. 2002    | Effect of series elasticity on isokinetic torque-angle relationship in humans.                                                     | Tendon forces are used as part of the calculation of other parameters and not                                |



|                        |                                                                                                                                | reported as evaluation results                                                                               |
|------------------------|--------------------------------------------------------------------------------------------------------------------------------|--------------------------------------------------------------------------------------------------------------|
| Kawakami et al. 2002   | In vivo muscle fibre behaviour during counter-movement exercise in humans reveals a significant role for tendon elasticity     | No dynamic exercises (laboratory setting)                                                                    |
| Kaya and Yucesoy 2020  | Muscle-tendon unit length-spastic muscle force data by combined intraoperative-musculoskeletal modelling work                  | No tendon forces/load evaluation                                                                             |
| Kernozek et al. 2016   | Comparing Two Methods for Estimating Achilles Tendon Loading during Running                                                    | Wrong publication type (Conference proceeding)                                                               |
| Kernozek et al. 2018   | The effects of habitual foot strike patterns on Achilles tendon loading in female runners                                      | Tendon forces are used as part of the calculation of other parameters and not reported as evaluation results |
| Kongsgaard et al. 2006 | Decline eccentric squats increases patellar tendon loading compared to standard eccentric squats                               | No dynamic exercises                                                                                         |
| Kouno et al. 2019      | Effects of the strain rate on mechanical properties of tendon structures in knee extensors and plantar flexors in vivo         | No dynamic exercises                                                                                         |
| Kruse et al. 2019      | Effects of serial casting on muscle-tendon properties, muscle function and gait in a healthy child with calf muscle shortening | No tendon forces/load evaluation                                                                             |
| Kubo et al. 1999       | Influence of elastic properties of tendon structures on jump performance in humans                                             | No tendon forces/load evaluation                                                                             |
| Kubo et al. 2000       | Elastic properties of muscle-tendon complex in long-distance runners                                                           | No tendon forces/load evaluation                                                                             |
| Kubo et al. 2001       | Influence of static stretching on viscoelastic properties of human tendon structures in vivo                                   | No tendon forces/load evaluation                                                                             |
| Kubo et al. 2002       | Measurement of viscoelastic properties of tendon structures in vivo                                                            | No tendon forces/load evaluation                                                                             |
| Kubo et al. 2003       | Gender differences in the viscoelastic properties of tendon structures                                                         | No tendon forces/load evaluation                                                                             |
| Kubo et al. 2005       | Effects of cold and hot water immersion on the mechanical                                                                      | No dynamic exercises                                                                                         |

|                       |                                                                                                                                   |                                                                                                              |
|-----------------------|-----------------------------------------------------------------------------------------------------------------------------------|--------------------------------------------------------------------------------------------------------------|
|                       | properties of human muscle and tendon in vivo.                                                                                    |                                                                                                              |
| Kubo et al. 2015      | Relationship between elastic properties of tendon structures and performance in long distance runners                             | No tendon forces/load evaluation                                                                             |
| Kubo et al. 2015      | Relationship between Achilles tendon properties and foot strike patterns in long-distance runners                                 | No tendon forces/load evaluation                                                                             |
| Kubo et al. 2020      | Mechanical properties of muscle and tendon at high strain rate in sprinters                                                       | No tendon forces/load evaluation                                                                             |
| Lee et al. 2015       | Repeatability and agreement of digital image correlation (DIC) for regional strain estimates of the in-vivo human patellar tendon | No tendon forces/load evaluation                                                                             |
| Lian et al. 1996      | Characteristics of the leg extensors in male volleyball players with jumper's knee                                                | No tendon forces/load evaluation                                                                             |
| Lian et al. 2003      | Performance characteristics of volleyball players with patellar tendinopathy                                                      | No tendon forces/load evaluation                                                                             |
| Lichtwark et al. 2006 | Interactions between the human gastrocnemius muscle and the Achilles tendon during incline, level and decline locomotion.         | Tendon forces are used as part of the calculation of other parameters and not reported as evaluation results |
| Lichtwark et al. 2011 | Achilles tendon (3D): Do the mechanical properties of tendon change in response to exercise?                                      | Wrong publication type (Conference proceeding)                                                               |
| Lima et al. 2017      | Triceps surae elasticity modulus measured by shear wave elastography is not correlated to the plantar flexion torque              | No tendon forces/load evaluation                                                                             |
| Lu et al. 2013        | Quantifying Catch-and-Release: The Extensor Tendon Force Needed to Overcome the Catching Flexors in Trigger Fingers               | No dynamic exercises (everyday tasks)                                                                        |
| Mademli et al. 2008   | Age-related effect of static and cyclic loadings on the strain-force curve of the vastus lateralis tendon and aponeurosis         | No dynamic exercises                                                                                         |
| Marouane et al. 2017  | Changes in Knee Adduction Rotation and not Adduction Moment Influence Joint                                                       | Wrong publication type (Conference proceeding)                                                               |

|                          | Compartmental Load Partitioning                                                                                                                                                     |                                                                                                              |
|--------------------------|-------------------------------------------------------------------------------------------------------------------------------------------------------------------------------------|--------------------------------------------------------------------------------------------------------------|
| Martin et al. 2012       | Effects of the index finger position and force production on the flexor digitorum superficialis moment arms at the metacarpophalangeal joints - a magnetic resonance imaging study. | No tendon forces/load evaluation                                                                             |
| Martin et al. 2018       | Gauging force by tapping tendons                                                                                                                                                    | No tendon forces/load evaluation                                                                             |
| Matsubayashi et al. 2008 | Ultrasonographic measurement of tendon displacement caused by active force generation in the psoas major muscle                                                                     | No tendon forces/load evaluation                                                                             |
| McCrum et al. 2018       | Loading rate and contraction duration effects on in vivo human Achilles tendon mechanical properties                                                                                | Tendon forces are used as part of the calculation of other parameters and not reported as evaluation results |
| McMahon et al. 2013      | The manipulation of strain, when stress is controlled, modulates in vivo tendon mechanical properties but not systemic TGF- $\beta$ 1 levels                                        | Tendon forces are used as part of the calculation of other parameters and not reported as evaluation results |
| McNair et al. 2013       | Biomechanical properties of the plantar flexor muscle-tendon complex 6 months post-rupture of the Achilles tendon                                                                   | No tendon forces/load evaluation                                                                             |
| Mileusnic et al. 2009    | Force estimation from ensembles of Golgi tendon organs                                                                                                                              | No tendon forces/load evaluation                                                                             |
| Mimura 1986              | [The load-bearing function of a patellar tendon bearing cast]                                                                                                                       | No tendon forces/load evaluation                                                                             |
| Monte 2021               | In vivo manipulation of muscle shape and tendinous stiffness affects the human ability to generate torque rapidly                                                                   | No tendon forces/load evaluation                                                                             |
| Nicol et al. 1998        | Significance of passively induced stretch reflexes on achilles tendon force enhancement                                                                                             | No active exercises evaluated                                                                                |
| Nicol et al. 1999        | Quantification of Achilles tendon force enhancement by passively induced dorsiflexion stretches                                                                                     | No active exercises evaluated                                                                                |
| Okuyama et al. 2019      | Study on fingertip force sensor based on measurement of tendon tension                                                                                                              | Tendon forces are used as part of the calculation of other parameters                                        |
| Olszewski et al. 2015    | Achilles tendon moment arms: the importance of measuring at                                                                                                                         | No dynamic exercises                                                                                         |

|                        |                                                                                                                                               |                                                                                                              |
|------------------------|-----------------------------------------------------------------------------------------------------------------------------------------------|--------------------------------------------------------------------------------------------------------------|
|                        | constant tendon load when using the tendon excursion method.                                                                                  |                                                                                                              |
| Pearson et al. 2013    | The use of normalized cross-correlation analysis for automatic tendon excursion measurement in dynamic ultrasound imaging.                    | Tendon forces are used as part of the calculation of other parameters and not reported as evaluation results |
| Peltonen et al. 2013   | Viscoelastic properties of the Achilles tendon in vivo                                                                                        | Tendon forces are used as part of the calculation of other parameters and not reported as evaluation results |
| Perl et al. 2012       | Effects of Footwear and Strike Type on Running Economy                                                                                        | No tendon forces/load evaluation (no data)                                                                   |
| Petrescu et al. 2016   | Evaluation of normal and pathological Achilles tendon by real-time shear wave elastography                                                    | No tendon forces/load evaluation (no data)                                                                   |
| Rowley et al. 2000     | The effect of the patellar tendon-bearing cast on loading                                                                                     | No tendon forces/load evaluation                                                                             |
| Salman et al. 2019     | Spatial Variations in Achilles Tendon Shear Wave Speed Using a Cost-Effective Method of Accelerometers                                        | Wrong publication type (Conference proceeding)                                                               |
| Saltzman et al. 1992   | The patellar tendon-bearing brace as treatment for neurotrophic arthropathy: a dynamic force monitoring study.                                | No tendon forces/load evaluation                                                                             |
| Sasaki et al. 2019     | Electromyographic analysis of infraspinatus and scapular muscles during external shoulder rotation with different weight loads and positions. | No tendon forces/load evaluation                                                                             |
| Sheehan et al. 2000    | Human patellar tendon strain. A noninvasive, in vivo study                                                                                    | No tendon forces/load evaluation                                                                             |
| Sinsel et al. 2013     | The musculoskeletal loading profile of the thumb during pipetting based on tendon displacement                                                | No tendon forces/load evaluation during exercises                                                            |
| Slane et al. 2014      | Non-uniform displacements within the Achilles tendon observed during passive and eccentric loading                                            | No tendon forces/load evaluation                                                                             |
| Stafilidis et al. 2007 | Muscle-tendon unit mechanical and morphological properties and sprint performance                                                             | Tendon forces are used as part of the calculation of other parameters and not reported as evaluation results |

|                              |                                                                                                                                                                  |                                                                                                              |
|------------------------------|------------------------------------------------------------------------------------------------------------------------------------------------------------------|--------------------------------------------------------------------------------------------------------------|
| Stanojev et al. 2018         | Effects of patellar tendon strap bracing on the motor performance and biomechanics of healthy adolescent athletes                                                | Wrong publication type (Conference proceeding)                                                               |
| Stegman et al. 2009          | A feasibility study for measuring accurate tendon displacements using an audio-based Fourier analysis of pulsed-wave Doppler ultrasound signals.                 | Wrong publication type (Conference proceeding)                                                               |
| Sugisaki et al. 2011         | Effect of muscle contraction levels on the force-length relationship of the human Achilles tendon during lengthening of the triceps surae muscle-tendon unit     | Tendon forces are used as part of the calculation of other parameters and not reported as evaluation results |
| Sussmilch-Leitch et al. 2012 | Effect of foot orthoses on ankle kinematics and kinetics in male runners with Achilles tendinopathy                                                              | Wrong publication type (Conference proceeding)                                                               |
| Taniguchi 1988               | [The load bearing function of patellar tendon bearing brace--on the relation between shaft length and rate of load bearing]                                      | No tendon forces/load evaluation                                                                             |
| Thomeer et al. 2020          | Load Distribution at the Patellofemoral Joint During Walking.                                                                                                    | No tendon forces/load evaluation                                                                             |
| Totorean et al. 2014         | The role of plantar pressure evaluation in rehabilitation of patients with Achilles tendon ruptures                                                              | No tendon forces/load evaluation                                                                             |
| Ullrich et al. 2010          | Influence of length-restricted strength training on athlete's power-load curves of knee extensors and flexors                                                    | No tendon forces/load evaluation                                                                             |
| Ushiyama et al. 2005         | Difference in aftereffects following prolonged Achilles tendon vibration on muscle activity during maximal voluntary contraction among plantar flexor synergists | No tendon forces/load evaluation                                                                             |
| Veeger et al. 2002           | Load on the shoulder in low intensity wheelchair propulsion.                                                                                                     | No tendon forces/load evaluation                                                                             |
| Wearing et al. 2019          | Do habitual foot-strike patterns in running influence functional Achilles tendon properties during gait?                                                         | No tendon forces/load evaluation                                                                             |
| Wearing et al. 2020          | Transmission-Mode Ultrasound for Monitoring the Instantaneous Elastic Modulus of the Achilles Tendon During                                                      | No tendon forces/load evaluation                                                                             |

|                        |                                                                                                                        |                                                          |
|------------------------|------------------------------------------------------------------------------------------------------------------------|----------------------------------------------------------|
|                        | Unilateral Submaximal Vertical Hopping                                                                                 |                                                          |
| Werkhausen et al. 2018 | Effect of training-induced changes in achilles tendon stiffness on muscle–tendon behavior during landing               | No tendon forces/load evaluation                         |
| Werkhausen et al. 2019 | Distinct muscle-tendon interaction during running at different speeds and in different loading conditions.             | No tendon forces/load evaluation                         |
| Westphal et al. 2013   | Load-Dependent Variations in Knee Kinematics Measured with Dynamic MRI                                                 | No dynamic exercises (No exercises are used)             |
| Woodburn et al. 2013   | Achilles tendon biomechanics in psoriatic arthritis patients with ultrasound proven enthesitis                         | The method of evaluating tendon forces is not specified. |
| Wretenberg et al. 1993 | Passive knee muscle moment arms measured in vivo with MRI                                                              | No active exercises                                      |
| Wu et al. 2013         | The musculoskeletal loading profile of the thumb during pipetting based on tendon displacement                         | No tendon forces/load evaluation                         |
| Yamaguchi et al. 2002  | Effect of different frequencies of skipping rope on elastic components of muscle and tendon in human triceps surae     | Wrong language (Japanese)                                |
| Yamamoto et al. 2020   | Effects of Varying Plantarflexion Stiffness of Ankle-Foot Orthosis on Achilles Tendon and Propulsion Force during Gait | No tendon forces/load evaluation                         |
| Yoshitake et al. 2004  | Fluctuations in plantar flexion force are reduced after prolonged tendon vibration                                     | No tendon forces/load evaluation                         |
